# Supplementary material
Source: Springer Nature journal article supplement (https://www.springermedizin.de/resource/supplementary/12905_2007_119_MOESM3_ESM.pdf/9519158)
Supplement: MOESM3 [file 9519158]

000000  
101010  
011001  
110011  
000111  
101101  
011110  
110100

**Original  
array**

Array for six attributes with two levels each. The lower, less attractive level is allocated to = 0. The more attractive level is allocated = 1. The array produces an extreme scenario (000000), which is undesirable, therefore modulo arithmetic is used on it to transform every third digit to it's opposite. Scenarios are then constructed from the new array.

001001  
100011  
010000  
111010  
001110  
100100  
010111  
111101

**New  
array**
